# Supplementary material
Source: Springer Nature journal article supplement (https://www.springermedizin.de/resource/supplementary/13256_2009_1151_MOESM2_ESM.pdf/9647116)

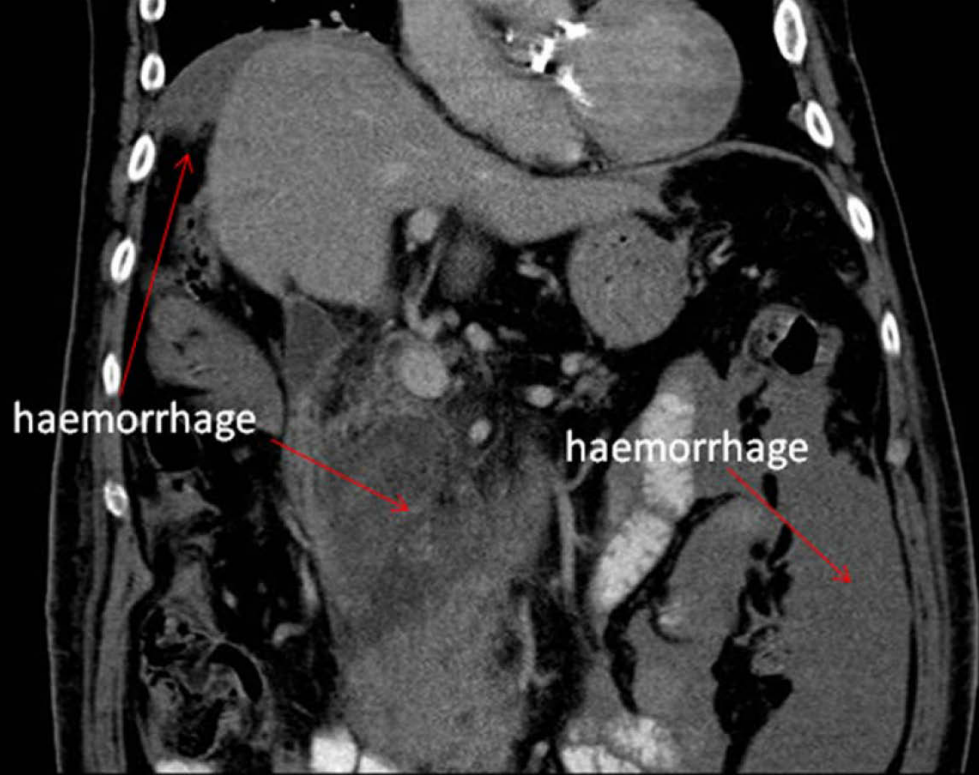

haemorrhage

haemorrhage

Supplement: MOESM2 [file 9647116]
